# Supplementary material for: Particulate Matters Induce Apoptosis in Human Hair Follicular Keratinocytes
Source: PubMed Central journal article supplement — Ann Dermatol. 2020 Sep 29;32(5):388–94. doi: 10.5021/ad.2020.32.5.388 (PMC7992589; doi:10.5021/ad.2020.32.5.388), 2020-09-29
Supplement: ad-32-388-s001.pdf [file ad-32-388-s001.pdf]

**Supplementary Table 1.** PCR primers used in this study

| Gene          | Oligonucleotide primers                         |                      |
|---------------|-------------------------------------------------|----------------------|
|               | Forward primer                                  | Reverse prime        |
| GAPDH         | TGGAAATCCCATCTTC                                | CGCCCCACTTGATTTTGG   |
| TNF- $\alpha$ | Hs_TNF_1_SG (QuantiTect Primer Assay, 98 bp)    |                      |
| IL-1 $\alpha$ | Hs_IL1A_1_SG (QuantiTect Primer Assay, 74 bp)   |                      |
| IL-1 $\beta$  | Hs_IL1B_1_SG (QuantiTect Primer Assay, 117 bp)  |                      |
| IL-6          | Hs_IL6_1_SG (QuantiTect Primer Assay, 107 bp)   |                      |
| IL-8          | Hs_CXCL8_1_SG (QuantiTect Primer Assay, 102 bp) |                      |
| MMP-1         | ATGTGAAACCCTGAAGGTG                             | CTGCTTGACCCTCAGAGACC |
| MMP-3         | GCAGTTTGCTCAGCCTATCC                            | GAGTGTCGGAGTCCAGCTTC |
| Duox1         | Hs_DUOX1_1_SG (QuantiTect Primer Assay, 82 bp)  |                      |

TNF: tumor necrosis factor, IL: interleukin, MMP: matrix metalloproteinases.
